# Supplementary material for: Zn2+ is Essential for Ca2+ Oscillations in Mouse Eggs
Source: PubMed Central journal article supplement (PMC10153198; doi:10.1101/2023.04.13.536745), 2023-04-17
Supplement: NIHPP2023.04.13.536745v2-supplement-1.pdf [file NIHPP2023.04.13.536745v2-supplement-1.pdf]

1048 **Supplementary Figure 1. Overexpression of ER accessory protein ERp44 did not change the Ca<sup>2+</sup>**  
1049 **responses initiated by *mPlcζ* mRNA microinjection, Acetylcholine, or SrCl<sub>2</sub>.**

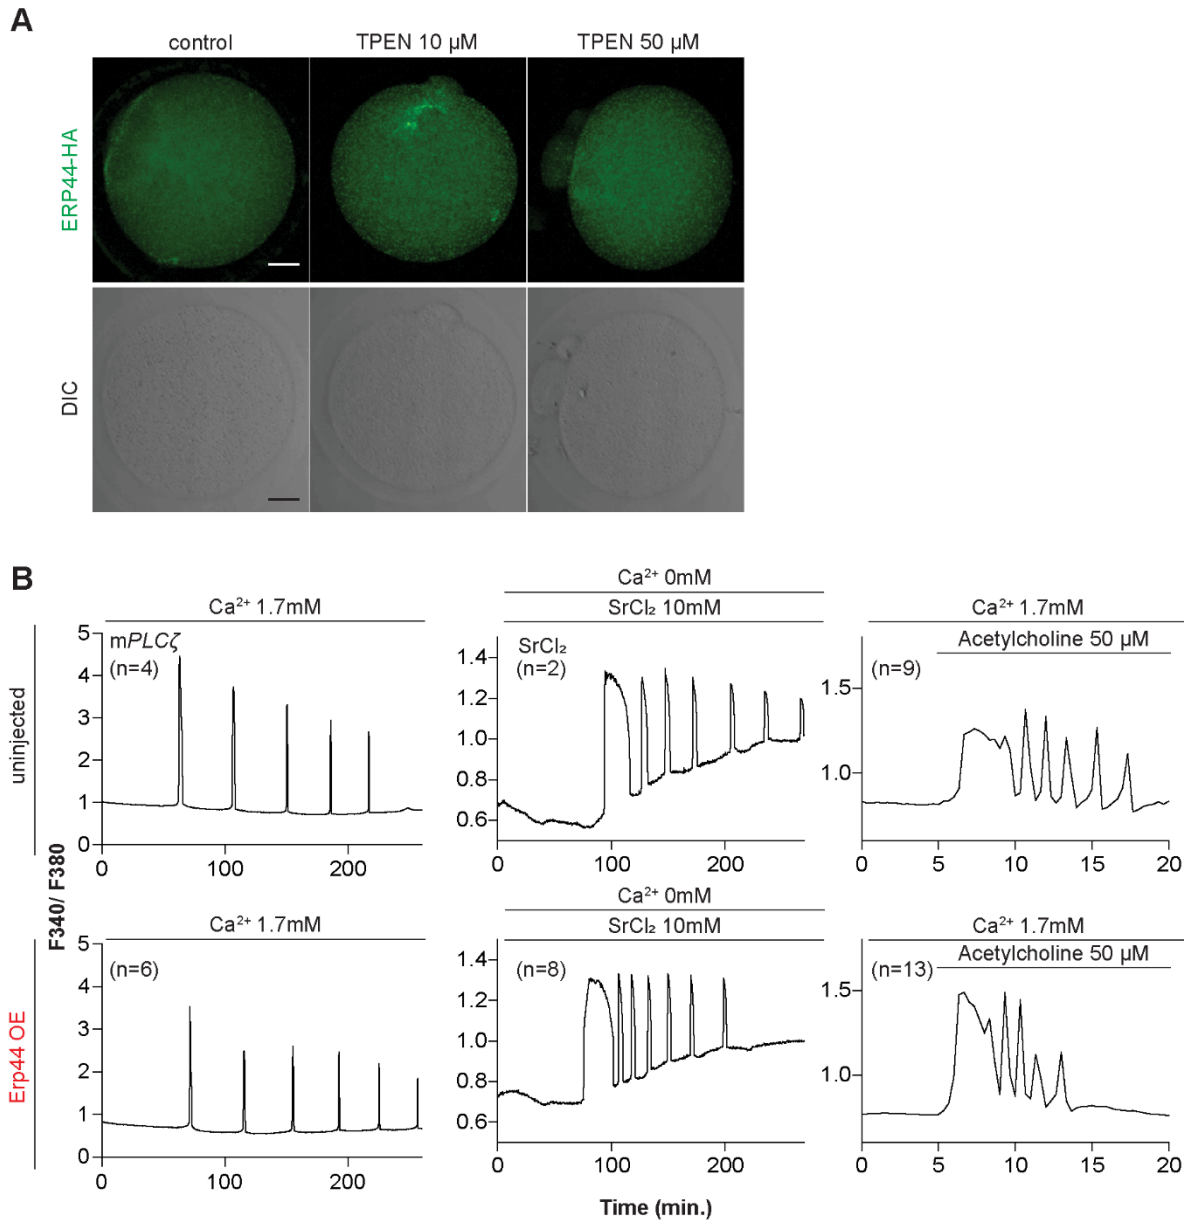

1050  
1051 (A) Representative immunofluorescent images of MII eggs with overexpression of ERp44. At 5 hr.  
1052 post microinjection, eggs were treated with 10 or 50  $\mu$ M of TPEN and incubated for 1 hr, after which  
1053 they were fixed and stained. An anti-HA antibody was used. Scale bar: 10  $\mu$ m. (B) Representative Ca<sup>2+</sup>  
1054 responses induced by *mPlcζ* mRNA microinjection (0.01  $\mu$ g/  $\mu$ l-left column), SrCl<sub>2</sub> (10 mM-center  
1055 column), and acetylcholine (50  $\mu$ M-right column) in eggs with (top panels) or without (bottom panels)  
1056 ERp44 overexpression.

1057 **Supplementary Figure 2. Elevated Zn<sup>2+</sup> impairs egg activation and the subsequent embryo**  
 1058 **development.**

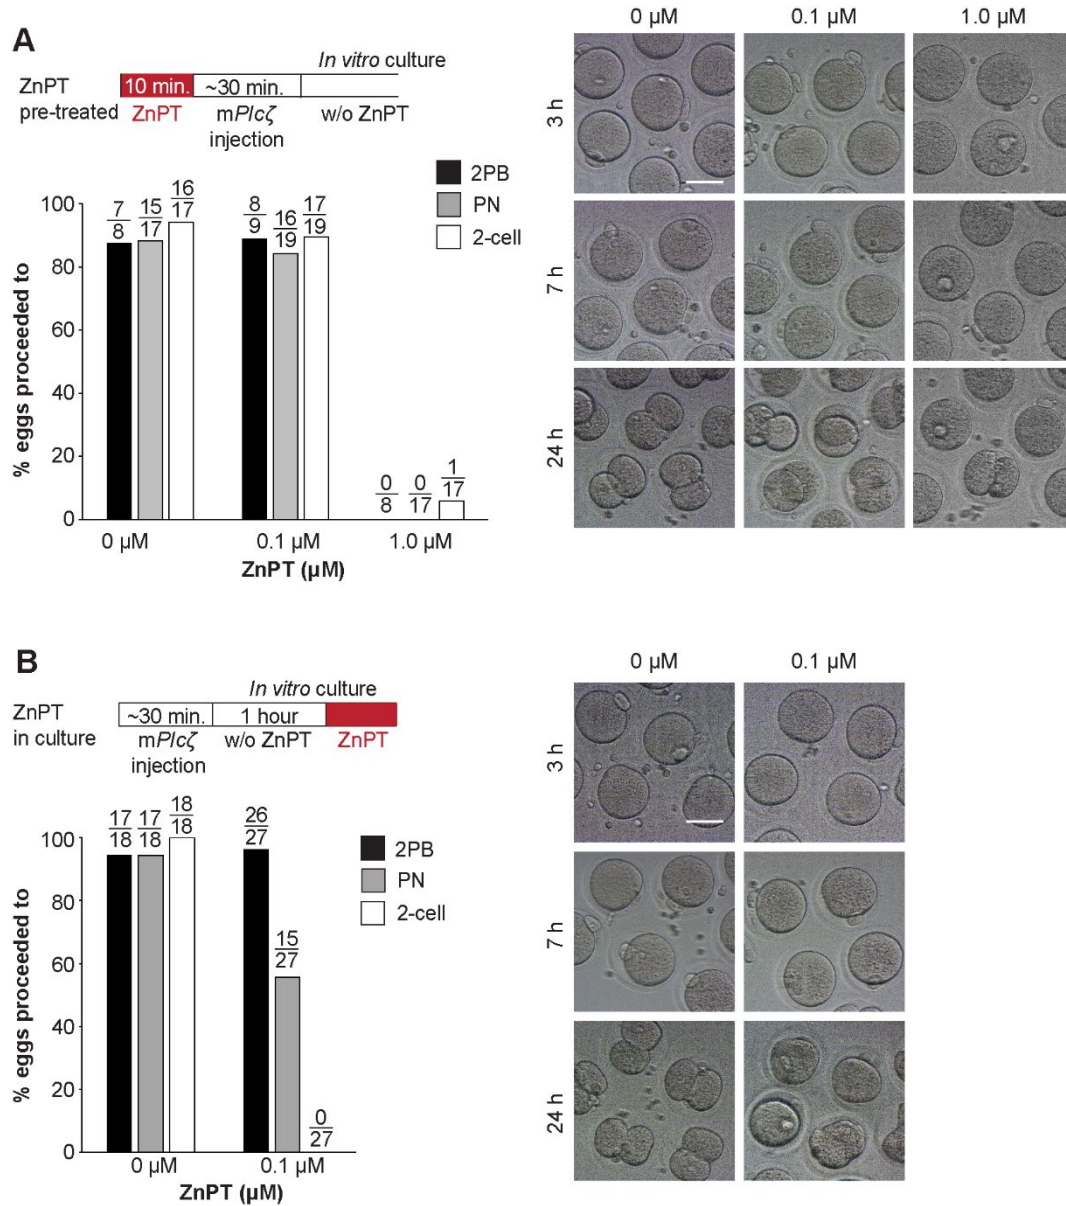

1059

1060 (A) MII eggs were incubated in TL-HEPES containing 0, 0.1, or 1.0 μM ZnPT at room temperature  
 1061 for 10 min and washed several times with fresh TL-HEPES and injected with *mP/cζ* mRNA. After it,  
 1062 eggs and zygotes were cultured in KSOM for 24 hr. PN formation and 2-cell development were  
 1063 checked at 7- and 24-hr post-microinjection. Bars represent the percentages of injected eggs that  
 1064 reached the PN and the 2-cell stage. Scale bar: 50 μm. (B) MII eggs injected with *mP/cζ* mRNA were  
 1065 incubated in KSOM without ZnPT for an hr. and then incubated in KSOM with 0 or 0.1 μM ZnPT for  
 1066 24 hr. The second polar body extrusion, PN formation, and 2-cell development were checked at 2.5-,  
 1067 7- and 24-hr. post-microinjection. Bars represent the percentages of injected eggs that reached the PN  
 1068 and the 2-cell stage. Scale bar: 50 μm.
